# Supplementary material for: NMR structure of a vestigial nuclease provides insight into the evolution of functional transitions in viral dsDNA packaging motors
Source: PubMed Central journal article supplement (PMC7672431; doi:10.1093/nar/gkaa874), 2020-10-21
Supplement: gkaa874_supplemental_file.pdf [file gkaa874_supplemental_file.pdf]

## Supplementary Materials

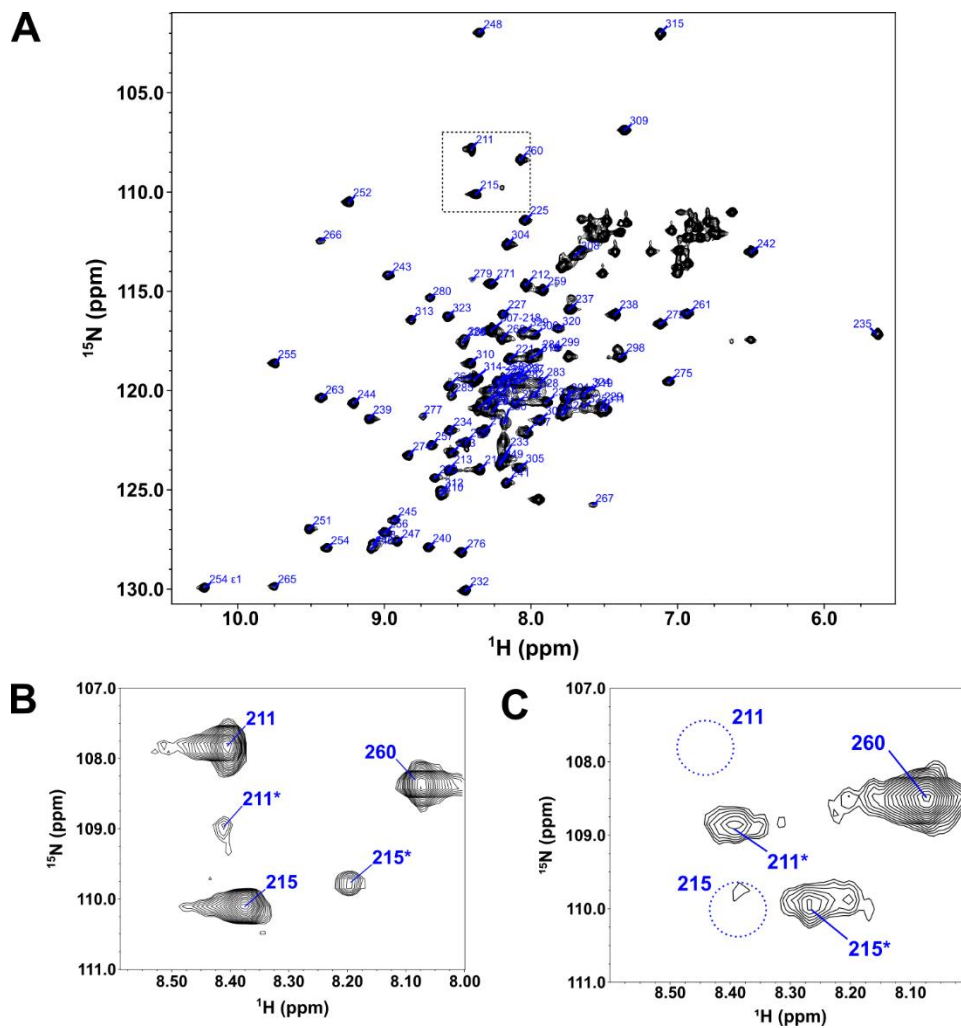

**Figure S1. NMR Spectrum of phi29 gp16 (208-332).** (A) The  $^1\text{H}$ - $^{15}\text{N}$  HSQC of the phi29 gp16 (208-332) with backbone peaks labeled by residue number. The tryptophan side chain epsilon proton-nitrogen pair is also labeled. (B) Inset of the HSQC from the boxed region in (A). This region illustrates the extra peaks from the N-terminal tail described in the text. (C) An HSQC collected on an older gp16 sample. The region of the HSQC is the same shown in (B).

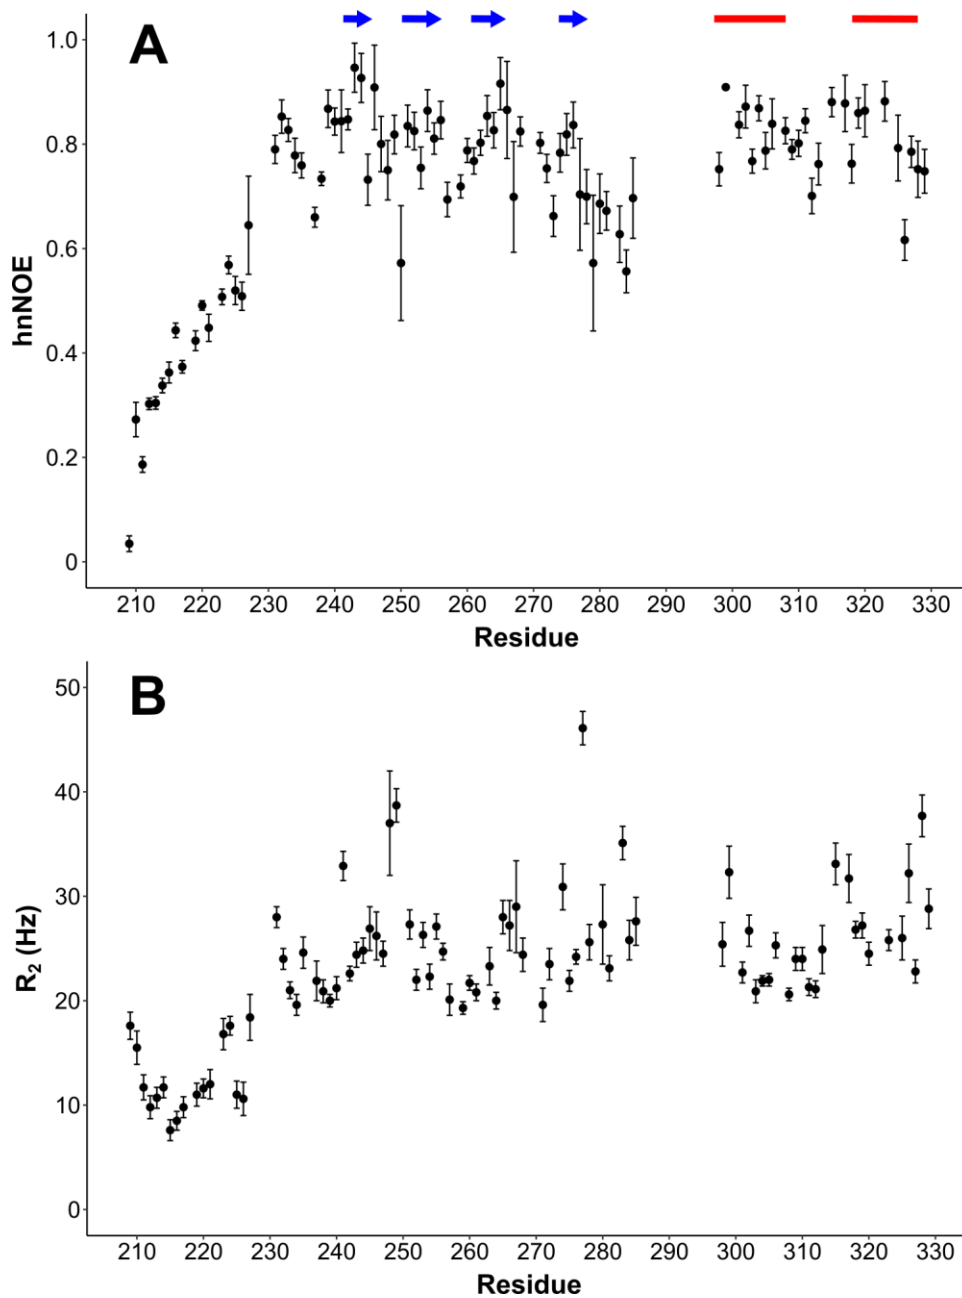

**Figure S2. Backbone Dynamics of phi29 gp16 (208-332).** (A) Heteronuclear NOE (hnNOE) of the CTD-L. This data is sensitive to fast time scale motions (ps-ns) with rigidity increasing with increasing hnNOE values. A hnNOE value  $< 0.65$  is considered to be flexible. (B) Relaxation data from the CTD-L. Higher than average spin-spin relaxation rates ( $R_2$ ) are indicative substantial signal broadening caused by exchanging structural states on NMR timescale ( $\mu$ s-ms). Residues in secondary structure elements are indicated by blue arrows ( $\beta$ -sheets) and red bars ( $\alpha$ -helix) at the top of the figure.

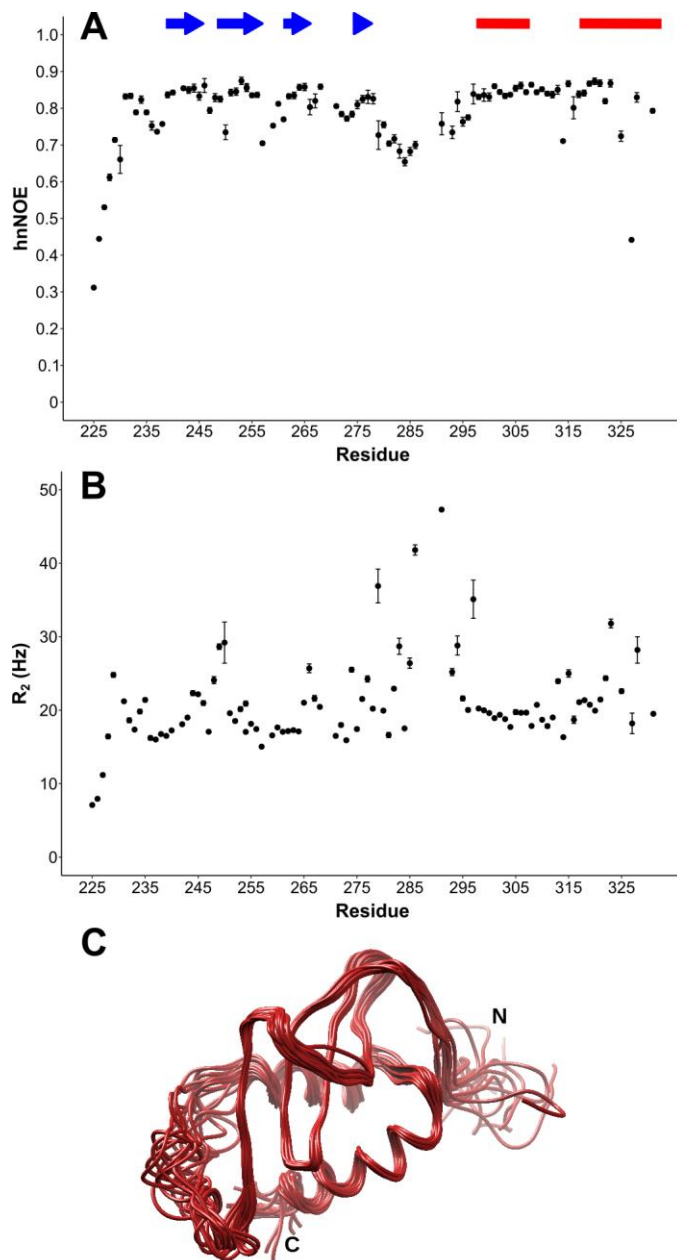

**Figure S3. Backbone Dynamics of phi29 gp16 (223-332).** (A) Heteronuclear NOE (hnNOE) of the CTD. (B) Relaxation data from the CTD. The data collectively highlight the flexibility of the N- and C-terminal tails, as well as the dynamics of the flexible loop between the 4<sup>th</sup>  $\beta$ -strand and the 1<sup>st</sup>  $\alpha$ -helix (residues 282-296). (C) The 15-structure ensemble of the CTD.

**Table S1 Structure Statistics for phi29 gp16 (223-332)**

| <b>Experimental Restraints</b>                       |             |
|------------------------------------------------------|-------------|
| Long Range NOE ( $5 < i - j$ ) <sup>1</sup>          | 238         |
| Medium Range NOE ( $1 < i - j \leq 5$ ) <sup>1</sup> | 111         |
| Sequential NOE                                       | 171         |
| Backbone Dihedral Angle                              | 212         |
| Hydrogen Bond                                        | 44          |
| Total Restraints                                     | 776         |
| <b>Ensemble Statistics (15 structures)</b>           |             |
| RMSD Distance and Ideal Geometry Restraints          |             |
| Distance (Å)                                         | 0.061±0.002 |
| Bond Length (Å)                                      | 0.016       |
| Bond Angle (°)                                       | 0.967±0.017 |
| Bond Improper (°)                                    | 0.508±0.029 |
| Ramachandran Statistics (MolProbity)                 |             |
| Favored Region (%)                                   | 91.4        |
| Allowed Region (%)                                   | 98.5        |
| Disallowed Region (%)                                | 1.5         |
| RMSD from Average Structure                          |             |
| Backbone Atoms (Secondary Structure) <sup>2</sup>    | 0.58        |
| All Heavy Atoms (Secondary Structure) <sup>2</sup>   | 1.1         |

<sup>1</sup> $i-j$  is the distance of two residues in sequence space

<sup>2</sup>Secondary structures residues are defined as  
242-245,250-256,261-265,274-278,297-308,318-328

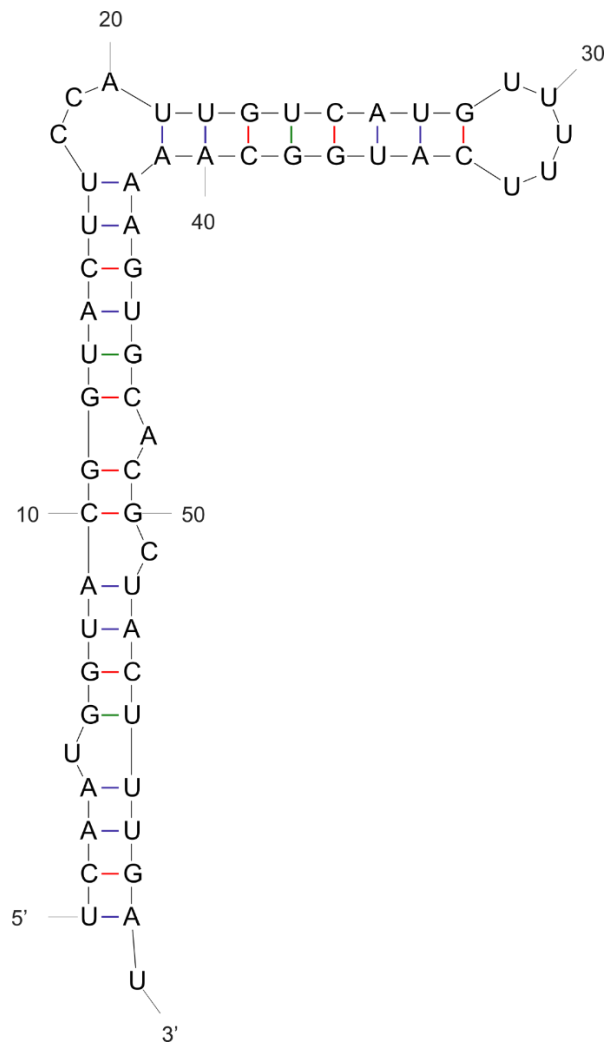

**Figure S4. A secondary structure diagram of the pRNA mimic.** The secondary structure was predicted using the mFold web server (1).

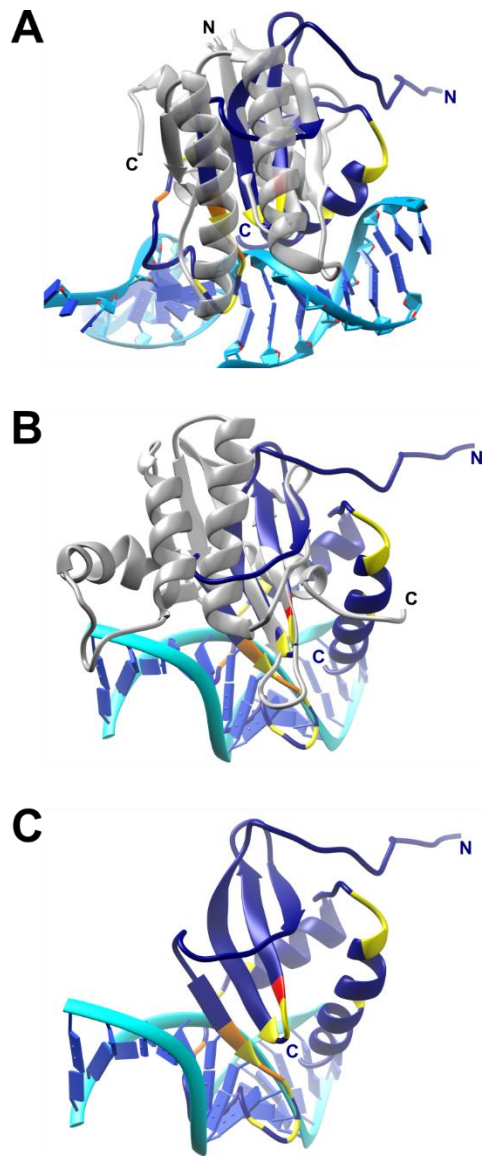

**Figure S5. Superimpositions of CTD with RNase H family bound to nucleic acid substrate. (A)** The superimposition of CTD with *T. thermophiles* RuvC bound to a Holiday Junction (2)(PDB: 4LD0). The front helices of the RuvC are partially transparent to better visualize the beta-sheet. **(B)** The superimposition of CTD to RNase H1 bound to an RNA/DNA hybrid (3)(PDB: 2QKK). **(C)** The same superimposition as (B) with the RNase H1 removed. The residues are colored by their CSP with dsDNA bound (Fig. 5C): >1 std. dev. (yellow), >2 std. dev. (orange), >3 std. dev. (red).

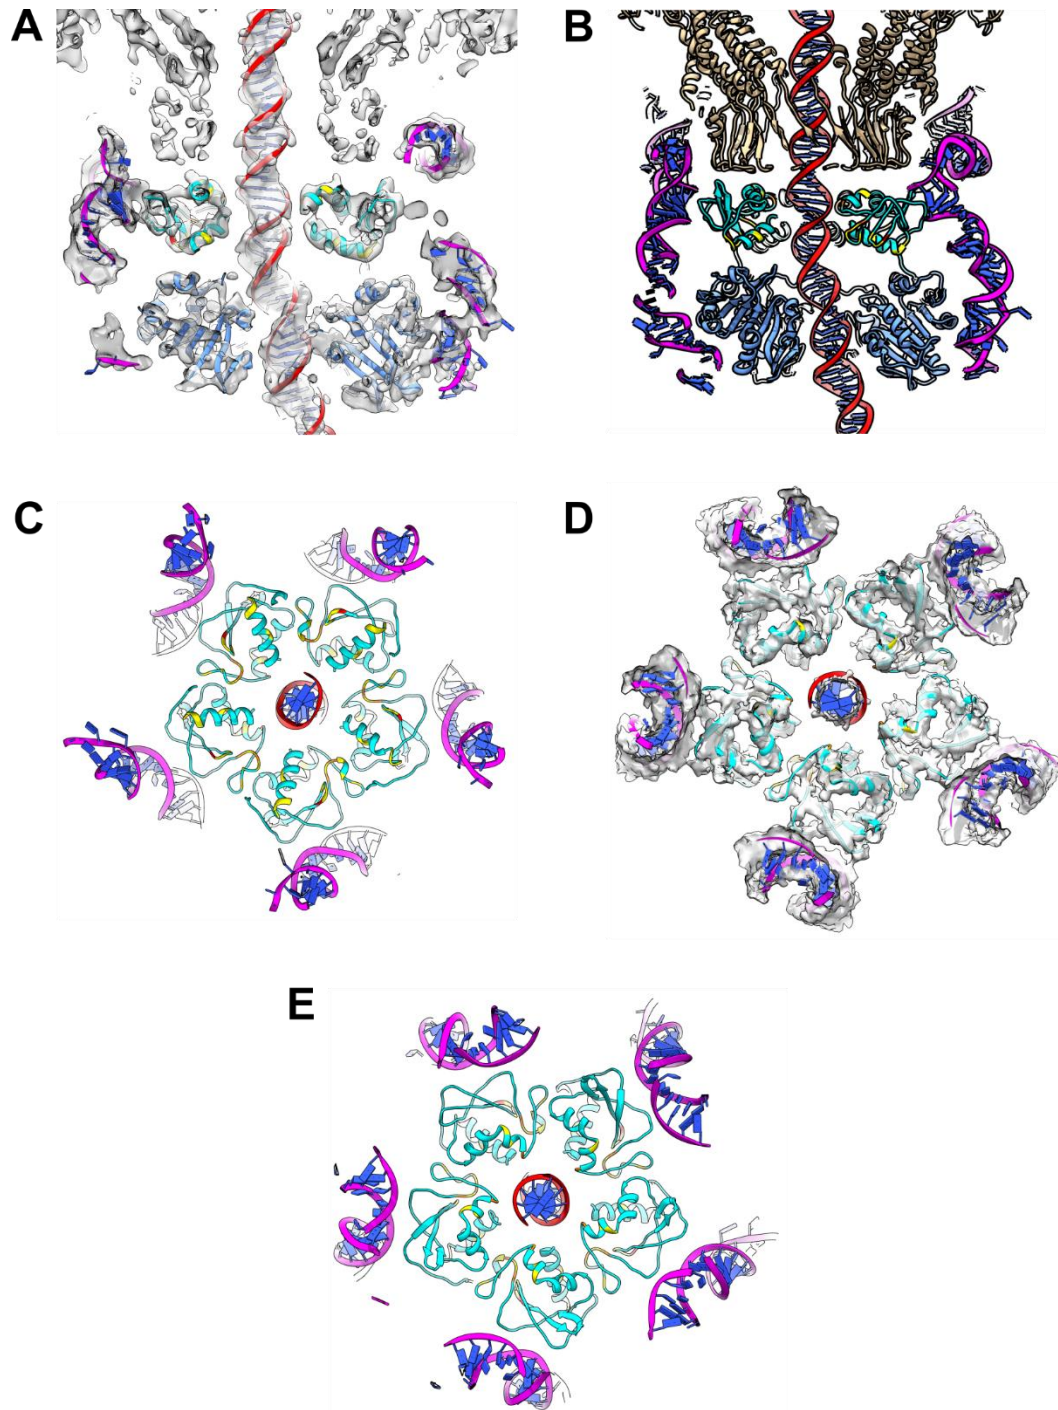

**Figure S6. High-resolution structures of phi29 motor components fit to cryoEM density. (A)** A side-view of the CTD fitted in its corresponding model. **(B)** The same view as (A) where the density has been removed to facilitate viewing. **(C)** A view from the bottom of the CTD towards the procapsid with the density removed. The view is the same as Fig 5H. **(D)** A view from the top of the CTD towards the NTD. **(E)** The same view as (D) with the density removed. The NMR structure of the CTD is shown in cyan with

DNA-interacting residues identified in CSP data colored as in Fig S5. The crystal structures of the NTD (4)(PDB: 5HD9) is shown in medium blue and the connector protein (5)(PDB: 1FOU) is shown in khaki. The models of the pRNA (6)(PDB: 3R3F) and of B-form DNA are shown in magenta and red respectively, with bases colored blue.



## References

1. Zuker, M. (2003) Mfold web server for nucleic acid folding and hybridization prediction. *Nucleic Acids Res.*, **31**, 3406–3415.
2. Górecka, K.M., Komorowska, W. and Nowotny, M. (2013) Crystal structure of RuvC resolvase in complex with Holliday junction substrate. *Nucleic Acids Res.*, **41**, 9945–9955.
3. Nowotny, M., Gaidamakov, S.A., Ghirlando, R., Cerritelli, S.M., Crouch, R.J. and Yang, W. (2007) Structure of Human RNase H1 Complexed with an RNA/DNA Hybrid: Insight into HIV Reverse Transcription. *Mol. Cell*, **28**, 264–276.
4. Mao, H., Saha, M., Reyes-Aldrete, E., Sherman, M., Woodson, M., Atz, R., Grimes, S., Jardine, P. and Morais, M. (2016) Structural and Molecular Basis for Coordination in a Viral DNA Packaging Motor. *Cell Rep.*, **14**, 2017–2029.
5. Simpson, A.A., Tao, Y., Leiman, P.G., Badasso, M.O., He, Y., Jardine, P.J., Olson, N.H., Morais, M.C., Grimes, S., Anderson, D.L., *et al.* (2000) Structure of the bacteriophage  $\phi$ 29 DNA packaging motor. *Nature*, **408**, 745–750.
6. Ding, F., Lu, C., Zhao, W., Rajashankar, K.R., Anderson, D.L., Jardine, P.J., Grimes, S. and Ke, A. (2011) Structure and assembly of the essential RNA ring component of a viral DNA packaging motor. *Proc. Natl. Acad. Sci.*, **108**, 7357–7362.
